# Supplementary material
Source: PubMed Central journal article supplement (PMC7483361)

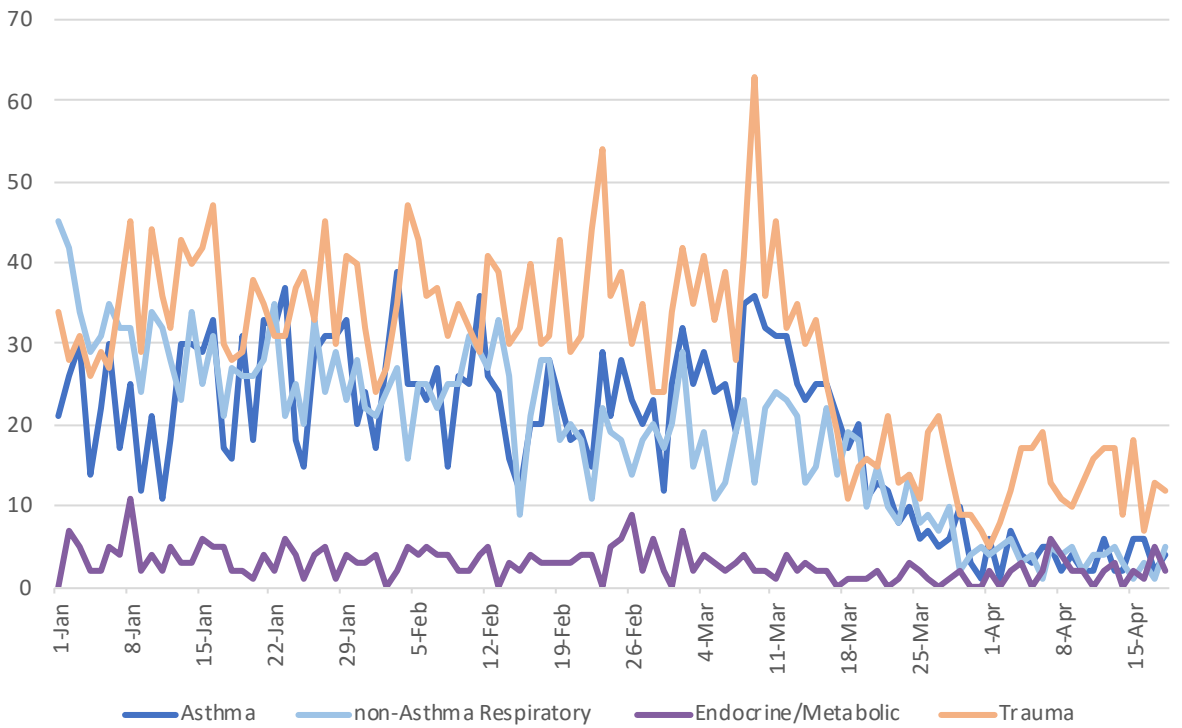

Supplement: NIHMS1601685-supplement-Supplemental_Figure_1.pdf [file NIHMS1601685-supplement-Supplemental_Figure_1.pdf]
